# Supplementary material
Source: Research Square preprint supplement (doi:10.21203/rs.3.rs-8993860/v1)
Supplement: Supplementary file 1 [file bea61c9862676da3dea6e972.xlsx]

## Sheet: Sheet1
Pregnancies	Glucose	BloodPressure	SkinThickness	Insulin	BMI	DiabetesPedigreeFunction	Age	Dataset_Split	Actual_Outcome	Predicted_Outcome
5	149	76	36	26	43.3	0.45	32	Train	1
11	150	74	48	254	26.7	0.058	69	Train	0
8	103	67	25	130	43.8	1.593	29	Train	0
9	166	51	31	68	20.7	2.184	74	Train	0
11	186	95	26	105	42.5	1.411	57	Train	0
5	119	108	30	261	21.1	2.307	31	Train	0
0	111	71	37	75	18.4	1.764	33	Train	0
0	117	67	39	268	33	0.144	47	Train	0
1	118	106	17	259	39.5	1.587	33	Train	1
7	136	83	24	181	25.9	1.318	23	Train	1
6	167	93	21	98	21.8	1.387	42	Train	1
9	108	52	22	89	27.3	2.035	27	Train	1
2	116	76	51	62	44.5	1.766	41	Train	0
4	146	76	30	20	35	2.354	62	Train	1
5	90	102	47	74	24.9	1.243	68	Train	0
2	164	105	12	267	40.5	1.387	67	Train	0
4	80	57	43	250	42.9	0.13	21	Train	1
11	96	112	20	50	27.8	1.452	73	Train	0
10	110	81	18	260	27.5	2.229	54	Train	1
2	83	96	15	283	35.9	0.056	26	Train	0
4	158	119	10	159	39.4	0.201	37	Train	0
7	188	105	12	280	26.1	1.27	65	Train	0
7	139	65	51	246	24.4	1.452	60	Train	1
9	133	64	14	292	38.8	0.822	50	Train	1
1	192	106	55	82	21.6	2.209	69	Train	0
7	195	51	10	65	23.9	1.278	71	Train	0
0	198	68	45	68	30.6	2.077	43	Train	0
6	149	112	40	235	31.3	1.473	71	Train	0
9	129	95	14	182	39.1	0.054	38	Train	1
9	154	115	21	95	30.1	0.057	53	Train	1
7	187	102	54	145	22.7	1.462	53	Train	0
6	126	78	26	249	31	1.859	35	Train	1
9	107	88	24	129	22.1	1.19	22	Train	0
1	113	70	12	100	22.1	1.582	42	Train	1
0	152	101	59	247	28.8	1.217	51	Train	1
1	148	109	25	190	23.3	0.376	21	Train	1
8	119	114	42	250	33	0.617	33	Train	0
8	112	64	34	56	23.8	2.445	42	Train	0
3	191	102	10	56	28.8	2.496	41	Train	1
10	177	94	11	222	28.2	2.007	48	Train	1
9	87	66	37	59	22.7	0.133	36	Train	1
8	113	114	13	129	29.9	2.452	73	Train	0
7	142	80	57	30	34.1	1.044	23	Train	0
3	94	60	27	42	27.6	1.027	48	Train	1
6	157	95	51	148	36.5	0.157	45	Train	0
5	123	109	29	49	42.2	0.727	35	Train	0
1	141	92	54	126	33.2	1.289	52	Train	0
9	165	114	59	102	34.2	0.659	30	Train	1
3	116	55	43	119	36.9	0.57	32	Train	1
4	92	105	16	233	43.1	2.235	41	Train	1
8	133	92	33	140	18.8	0.245	34	Train	0
1	198	70	59	260	32.5	0.291	69	Train	0
11	106	118	59	195	18.2	1.796	68	Train	0
10	162	68	57	103	23.6	2.02	53	Train	1
4	181	99	18	273	38	0.078	66	Train	1
0	179	65	39	79	43.4	1.177	70	Train	0
3	92	67	28	88	19.7	2.035	40	Train	1
9	185	111	26	116	28.5	0.314	40	Train	1
2	179	57	44	238	38.9	0.288	54	Train	0
0	105	114	38	174	44.9	1.551	63	Train	0
4	181	105	50	46	29.9	0.423	62	Train	0
9	81	52	48	29	38	1.88	40	Train	0
2	188	54	20	17	28.1	0.107	74	Train	1
7	121	66	33	62	26.9	2.2	67	Train	0
7	187	118	11	50	22.5	1.084	29	Train	0
10	135	80	55	47	26.6	0.061	22	Train	0
9	135	102	41	47	26.8	1.715	28	Train	1
8	144	86	34	260	28	1.511	54	Train	0
6	95	109	19	171	43	1.285	74	Train	1
9	172	81	41	234	42.5	2.33	30	Train	0
3	120	85	37	26	30.3	1.479	25	Train	0
7	140	82	44	181	25.2	1.079	70	Train	1
7	150	100	47	31	37.6	1.681	70	Train	0
4	129	101	28	199	23	1.877	56	Train	0
11	130	55	28	265	32.1	0.656	25	Train	0
5	112	83	37	152	26.2	0.288	28	Train	0
9	170	50	34	207	18.1	2.472	56	Train	0
3	100	59	14	226	36.8	2.231	56	Train	0
6	132	81	11	297	24.3	1.909	72	Train	0
8	118	85	54	17	22.8	2.043	53	Train	0
0	145	110	47	53	26.1	1.589	27	Train	0
2	160	88	43	228	40.8	1.931	41	Train	1
10	137	61	33	174	30.3	1.224	25	Train	0
7	132	94	59	173	29	1.117	44	Train	0
7	169	93	54	51	21.4	0.161	42	Train	1
9	99	57	51	286	24.6	0.288	56	Train	0
7	174	112	42	235	27.6	0.522	56	Train	1
3	144	106	37	190	41.8	0.125	60	Train	0
10	122	102	26	88	44.9	0.215	23	Train	0
0	127	74	37	19	19.6	1.84	54	Train	0
8	101	93	22	58	21.5	1.899	29	Train	0
7	177	101	36	127	43.6	1.951	24	Train	0
7	81	60	50	118	29.9	1.687	25	Train	1
1	169	99	38	254	40.1	0.426	27	Train	0
1	118	68	32	289	43.7	1.757	60	Train	0
3	92	60	58	127	37.9	0.083	28	Train	1
0	192	111	48	74	34.3	0.309	24	Train	0
8	98	89	30	152	40.2	0.673	50	Train	0
6	157	56	53	233	18.9	0.129	51	Train	0
4	157	57	51	243	40.8	0.611	62	Train	0
5	168	62	29	279	35	0.759	34	Train	1
6	188	50	56	157	25.6	1.018	54	Train	1
2	170	53	47	102	24.4	0.108	57	Train	0
11	163	101	55	87	40.3	0.973	31	Train	1
5	119	65	21	184	19.1	2.104	50	Train	0
11	178	117	47	45	44.6	1.357	47	Train	0
7	95	109	30	182	28.2	1.893	57	Train	1
8	117	116	44	89	42.5	1.321	70	Train	1
11	182	65	33	263	34.3	0.344	38	Train	0
11	176	111	11	34	42.6	2.234	66	Train	1
4	116	114	50	124	22.4	0.722	31	Train	0
4	178	69	31	268	36	0.706	36	Train	1
7	195	94	47	249	33.6	2.088	27	Train	0
7	190	111	17	143	22.7	1.176	70	Train	1
4	81	71	34	128	19.3	2.33	44	Train	0
9	112	50	34	244	30.9	1.182	57	Train	1
0	110	113	52	84	40.6	1.541	71	Train	0
2	181	51	29	193	20.9	1.722	45	Train	1
0	87	110	51	138	23	1.899	26	Train	1
10	192	72	40	33	44.6	1.973	46	Train	1
7	130	64	55	83	33.7	0.201	69	Train	1
1	130	74	37	210	19.3	1.129	29	Train	0
7	112	96	42	122	43.7	1.164	55	Train	0
9	123	82	24	89	19.4	2.162	33	Train	0
8	121	104	35	198	38	1.394	68	Train	0
10	149	74	23	80	44.9	1.434	73	Train	0
4	81	85	24	224	27.2	0.104	35	Train	0
0	177	107	46	123	44	0.49	58	Train	0
1	198	81	34	191	26.7	0.679	65	Train	0
9	131	89	13	133	40.8	0.739	53	Train	1
8	110	64	39	275	26.4	1.883	32	Train	1
2	162	98	41	65	31.8	0.141	31	Train	0
3	129	63	38	199	27.7	0.983	40	Train	0
1	161	69	22	181	43.6	1.395	50	Train	1
2	162	65	12	153	21.1	1.585	73	Train	0
7	175	91	18	237	22	1.197	51	Train	0
2	151	85	50	260	36.2	1.175	51	Train	1
10	101	75	25	167	25.4	1.724	42	Train	0
6	98	101	47	182	37.6	1.32	67	Train	1
0	126	84	17	73	21	0.774	43	Train	0
9	124	72	59	198	42.2	0.405	56	Train	1
2	171	83	28	15	37.4	2.244	63	Train	0
6	89	111	48	53	19.5	1.352	52	Train	0
6	84	57	57	100	20.5	0.937	49	Train	0
2	157	82	46	238	20.8	0.433	58	Train	0
7	143	53	58	216	32.5	1.713	64	Train	1
7	103	117	28	277	39.3	0.371	42	Train	0
0	175	107	18	120	23.2	1.103	52	Train	1
6	195	96	31	171	27	1.726	29	Train	0
5	139	71	14	56	39.7	2.129	51	Train	0
1	181	108	49	118	38	0.663	22	Train	0
10	144	114	51	235	28.9	2.432	37	Train	0
4	162	90	23	39	38.7	2.457	47	Train	0
6	111	112	50	125	40.6	0.103	22	Train	0
0	81	112	19	232	27	0.204	54	Train	0
6	164	97	20	212	20.7	1.594	73	Train	0
5	158	77	14	158	23	0.64	74	Train	1
1	185	92	53	242	25.2	0.925	36	Train	1
2	148	64	34	61	26.6	1.82	32	Train	1
1	134	101	35	290	22	0.162	52	Train	0
5	105	68	43	98	19.2	0.617	41	Train	1
4	163	60	28	89	40.1	2.363	49	Train	1
10	107	85	24	241	38.5	1.99	34	Train	1
0	136	99	56	258	35.6	0.266	28	Train	0
7	172	54	24	155	20.1	0.345	36	Train	0
8	88	55	17	265	25.1	0.69	40	Train	1
9	135	79	45	64	38.6	1.774	55	Train	0
5	189	103	23	230	40.2	1.9	72	Train	0
7	156	79	18	107	24.6	1.238	68	Train	0
0	126	88	48	93	19.1	2.381	68	Train	1
9	129	104	59	122	41.4	1.272	64	Train	0
3	91	92	24	17	24.4	1.607	47	Train	0
9	88	114	54	239	28.3	1.631	32	Train	0
1	141	118	27	145	34	1.612	64	Train	1
4	154	94	55	291	19.5	2.313	35	Train	1
4	103	100	54	71	34.1	1.3	72	Train	0
11	168	100	23	120	38.7	0.774	50	Train	0
6	169	85	33	52	19.4	0.865	25	Train	1
8	162	65	36	41	34.1	1.004	64	Train	0
11	162	89	41	164	38.2	0.476	70	Train	1
8	85	52	59	274	18.6	1.149	37	Train	0
11	191	85	33	205	29.4	0.445	58	Train	0
9	122	65	47	24	24.9	1.84	23	Train	0
2	126	65	52	171	27.3	2	24	Train	1
7	101	116	39	277	29.5	1.548	35	Train	0
5	131	84	55	139	33.8	1.673	44	Train	0
5	197	68	35	187	42.5	1.805	29	Train	0
4	153	68	27	254	37	0.348	62	Train	0
5	122	75	42	210	40.1	0.414	46	Train	1
8	93	67	36	175	41.7	0.714	60	Train	0
5	98	99	56	84	37	0.056	56	Train	0
8	103	87	55	105	35.8	0.882	65	Train	0
11	125	70	28	30	27.6	1.255	30	Train	0
1	175	90	34	235	26.1	2.165	64	Train	1
1	132	102	49	31	22.6	1.183	21	Train	0
8	113	73	21	38	41.1	0.113	30	Train	0
7	134	68	49	118	38.9	0.909	22	Train	1
0	94	101	16	158	20	2.366	38	Train	0
10	137	82	52	19	31	1.418	36	Train	0
3	191	87	14	180	42.5	0.514	43	Train	0
4	141	80	58	256	37.5	0.211	40	Train	0
2	120	90	49	78	22.9	2.463	36	Train	0
0	193	100	56	75	28.1	0.338	49	Train	1
11	152	118	31	192	39	1.579	26	Train	0
3	145	65	13	282	21.2	0.679	57	Train	0
5	102	113	19	38	22.8	1.542	38	Train	1
1	82	114	46	96	26.1	0.472	21	Train	1
2	166	70	34	27	37.3	2.319	57	Train	0
4	81	104	17	199	37.4	0.74	48	Train	0
3	152	73	42	43	42	0.535	61	Train	0
0	131	56	22	223	20.6	0.632	39	Train	0
6	151	74	32	159	32.5	1.176	73	Train	0
0	192	50	11	149	21	0.666	74	Train	0
7	167	98	17	36	37.6	1.098	36	Train	0
2	157	78	12	49	36.8	1.56	32	Train	0
10	142	51	46	185	24.8	0.155	27	Train	0
8	128	71	42	50	32.1	0.639	48	Train	0
3	80	50	30	249	40.3	0.437	72	Train	1
0	122	82	13	258	38	1.778	26	Train	0
8	119	90	31	297	28.8	2.002	25	Train	1
4	83	80	40	259	42.2	1.822	41	Train	0
2	137	103	45	89	25.2	1.528	73	Train	1
9	123	83	27	209	29.6	1.638	57	Train	0
0	133	72	27	220	26.8	0.289	23	Train	0
3	123	53	53	67	36	2.015	63	Train	0
8	154	84	41	179	45	1.894	25	Train	0
1	178	99	35	238	42.4	1.773	60	Train	0
10	197	87	49	190	24.2	0.9	47	Train	1
4	177	83	35	212	43.1	1.53	42	Train	0
11	155	62	39	49	43.9	1.381	65	Train	1
3	139	87	13	161	33.6	0.579	63	Train	1
3	146	115	57	106	38.8	2.334	63	Train	0
11	154	56	30	216	43.8	0.275	69	Train	1
10	171	53	17	119	23.8	1.212	74	Train	0
11	85	82	25	27	26.3	1.913	25	Train	0
6	106	94	18	72	39.3	1.984	68	Train	0
7	147	79	33	17	37.4	1.88	37	Train	0
3	111	96	19	261	19.3	1.027	70	Train	0
5	91	117	56	95	29.7	0.102	41	Train	0
3	83	116	11	81	41.5	1.328	40	Train	1
2	134	78	31	253	40.4	0.159	54	Train	1
4	81	107	23	86	43.1	0.898	21	Train	1
4	93	93	32	252	40.5	0.263	66	Train	0
0	139	70	37	285	42	0.418	41	Train	0
3	136	102	35	73	41	1.767	66	Train	0
3	161	81	27	188	23.1	1.51	55	Train	0
8	88	75	45	260	32.3	1.753	56	Train	0
3	118	113	42	97	29.2	1.592	45	Train	0
5	84	102	39	67	35.1	1.883	45	Train	0
6	150	109	50	257	30.1	1.437	33	Train	0
7	156	67	24	120	27.5	1.203	38	Train	1
5	153	72	31	168	30.7	1.865	57	Train	1
1	85	104	35	62	40.2	1.464	59	Train	1
7	159	63	58	182	33.2	1.956	62	Train	1
0	164	80	57	98	42.5	1.882	36	Train	1
10	139	73	29	178	22.5	0.791	42	Train	0
10	111	100	14	39	38.7	1.306	46	Train	1
2	170	71	54	76	25.1	0.477	40	Train	1
8	87	53	35	129	28.4	1.753	63	Train	0
2	187	73	34	163	22.8	1.343	46	Train	1
1	146	62	55	87	41.4	1.154	23	Train	1
4	112	57	22	70	40.8	1.343	53	Train	0
0	126	102	28	30	21.9	0.294	31	Train	0
4	155	80	45	206	29.6	1.319	60	Train	1
1	162	76	36	170	40.9	0.231	51	Train	0
7	124	58	23	104	22.1	2.054	73	Train	0
3	144	89	35	86	31.1	1.044	21	Train	0
1	117	106	10	111	30.5	0.357	31	Train	0
6	127	110	32	203	30.2	1.538	72	Train	1
6	153	75	24	222	42.4	1.223	60	Train	1
9	170	115	20	261	40.8	1.926	74	Train	0
10	164	77	49	136	22.5	2.088	53	Train	0
6	95	68	21	150	32	1.884	22	Train	1
9	145	51	29	180	36.4	1.163	66	Train	0
6	132	84	19	90	42.9	1.953	44	Train	1
0	149	52	45	88	42.2	2.263	47	Train	1
0	146	67	17	78	29	0.78	56	Train	1
2	169	61	50	54	25.9	0.523	60	Train	0
9	108	103	12	130	33.1	0.276	51	Train	1
6	99	109	37	29	27	0.796	27	Train	0
0	187	61	34	293	38.4	0.731	22	Train	0
6	97	53	12	169	35.6	0.758	36	Train	0
7	85	50	17	30	23.2	2.084	65	Train	1
0	189	101	31	96	26.3	0.896	38	Train	0
3	159	82	29	141	32.2	0.975	37	Train	1
9	90	55	24	268	39.8	1.38	48	Train	0
0	109	61	23	169	19.7	0.264	33	Train	1
3	97	119	43	103	19.5	1.479	40	Train	1
10	161	59	28	175	19.4	1.312	41	Train	1
11	126	96	32	122	27.3	0.58	23	Train	0
4	87	82	27	168	24.1	0.166	43	Train	0
7	97	88	21	75	24.1	1.195	74	Train	1
5	194	92	38	20	29.8	0.538	55	Train	0
3	166	113	54	270	37	0.268	33	Train	1
8	141	73	54	132	30	1.227	58	Train	0
8	144	90	12	244	20	1.31	60	Train	1
0	87	113	13	258	20.7	1.056	63	Train	0
6	109	113	20	281	28.4	2.448	42	Train	0
7	135	81	41	240	31.1	1.411	70	Train	0
9	108	68	54	272	34	2.152	64	Train	0
5	196	90	37	71	37.5	2.136	43	Train	0
4	179	55	42	137	21.2	1.988	28	Train	1
9	123	90	48	106	21.8	0.435	42	Train	1
10	178	75	39	292	29.4	0.383	36	Train	1
5	135	118	39	180	38.3	0.241	54	Train	0
2	184	99	43	235	31.3	1.18	71	Train	0
5	85	96	51	285	41	0.747	68	Train	0
6	130	63	53	157	18.6	1.334	28	Train	0
11	172	71	11	188	20.4	0.128	58	Train	0
6	143	99	51	101	21.8	0.267	56	Train	1
8	132	101	59	92	44.1	0.275	50	Train	1
11	185	64	35	214	33.1	1.843	74	Train	1
10	114	80	31	120	27.5	1.748	55	Train	0
7	178	60	58	205	39.1	1.676	34	Train	0
7	163	54	55	57	31.3	0.239	26	Train	0
7	157	57	58	161	37.6	1.797	68	Train	0
11	117	104	10	138	32.1	2.215	47	Train	0
2	169	109	48	90	38	0.629	26	Train	0
6	134	91	17	283	31.9	1.656	54	Train	0
11	84	85	31	43	29.9	0.915	53	Train	1
0	123	106	15	188	26.9	1.227	33	Train	0
5	91	63	25	135	20.3	1.383	62	Train	0
2	109	61	23	293	43.8	2.043	48	Train	1
1	156	102	26	91	23.9	0.686	48	Train	0
11	169	116	43	199	25.2	2.034	55	Train	0
10	112	71	40	101	45	1.371	26	Train	0
8	130	84	46	162	36.1	0.341	38	Train	0
5	184	111	42	141	41.8	2.13	51	Train	0
9	131	110	18	269	21	1.636	54	Train	0
4	122	58	54	231	18.5	0.134	34	Train	1
9	103	77	50	234	25	1.182	23	Train	0
11	195	75	13	183	39	0.812	30	Train	1
11	169	86	34	122	25.7	1.482	55	Train	0
1	123	64	24	269	32	1.825	72	Train	1
2	194	53	13	133	42.5	0.999	36	Train	1
0	195	93	58	17	38.8	0.89	28	Train	1
10	184	58	45	23	42.1	0.934	65	Train	0
4	168	105	41	218	22.6	0.619	28	Train	0
7	175	67	11	214	34.4	0.83	33	Train	0
0	108	110	10	44	27.1	2.104	33	Train	0
6	144	82	52	238	26.7	1.859	42	Train	0
2	194	77	41	206	18	1.784	62	Train	0
4	166	102	28	284	19.8	1.276	59	Train	1
3	138	100	12	76	28	0.775	23	Train	1
6	168	76	25	170	37.1	1.931	30	Train	0
7	131	87	48	148	22.8	2.224	57	Train	0
6	102	74	53	63	42	2.467	28	Train	1
3	90	106	49	179	41	1.416	66	Train	0
0	187	90	30	225	31.5	1.322	54	Train	1
6	111	102	11	82	39.6	1.807	48	Train	0
4	196	88	10	33	28.1	1.272	62	Train	1
7	89	69	55	86	36.8	1.154	34	Train	0
6	183	94	59	196	42.8	0.516	54	Train	0
2	86	70	28	286	24.2	1.309	30	Train	0
10	110	113	39	67	26.3	0.299	54	Train	1
9	147	71	54	189	32.3	1.014	41	Train	1
10	98	115	36	240	38.8	1.268	59	Train	0
5	92	118	17	68	27.2	1.136	61	Train	1
9	153	68	13	18	25	1.65	27	Train	1
9	154	118	31	167	30.4	0.51	42	Train	0
9	171	66	29	186	44.8	0.331	57	Train	0
8	145	109	25	169	33.6	2.125	51	Train	1
6	165	106	15	16	34.1	1.139	33	Train	0
4	133	94	13	269	29.3	0.055	63	Train	0
2	122	85	18	277	25.9	1.177	25	Train	0
10	86	89	18	289	22.5	2.178	46	Train	0
11	89	111	53	49	29.7	0.397	45	Train	0
9	116	82	53	46	22.8	1.698	51	Train	0
4	198	117	41	66	41.7	1.876	61	Train	0
0	167	103	35	51	43.6	1.511	38	Train	0
0	139	112	22	142	28.2	2.223	66	Train	0
3	88	58	18	269	22.6	1.739	43	Train	0
10	133	84	14	151	32.9	1.815	38	Train	0
4	167	83	27	17	38	1.232	74	Train	1
9	98	75	38	290	25.6	1.336	23	Train	0
3	186	117	47	237	33.7	0.464	66	Train	0
9	101	51	57	90	18.7	2.018	33	Train	0
1	147	58	33	296	27.8	1.798	67	Train	0
2	94	77	16	222	30.5	2.021	26	Train	0
5	100	79	10	205	34.4	0.398	49	Train	1
4	187	60	33	219	19.5	0.668	42	Train	0
0	165	111	51	62	26.2	1.898	58	Train	0
11	89	66	32	93	40.3	0.921	57	Train	0
8	122	50	33	46	40.4	2.323	67	Train	1
2	146	80	18	266	22.3	0.28	60	Train	1
3	100	53	12	48	43.5	2.073	46	Train	1
9	187	114	28	186	37.5	2.11	50	Train	0
9	96	88	13	269	33	1.26	43	Train	0
4	138	117	47	24	40.1	1.653	54	Train	0
4	157	80	24	142	19.1	0.736	71	Train	1
8	122	71	25	254	27	1.822	54	Train	1
2	115	76	13	199	38.3	2.233	35	Train	0
1	155	60	44	229	42.9	0.795	38	Train	1
6	108	119	27	61	32.1	2.397	25	Train	0
3	186	83	10	265	18.2	1.458	38	Train	0
8	165	86	52	180	37.5	0.114	59	Train	0
9	114	59	54	153	42.9	1.101	42	Train	1
7	124	50	52	118	40.7	0.439	24	Train	1
0	186	105	44	65	25.4	0.974	46	Train	0
5	198	119	24	188	18.3	1.069	29	Train	0
2	172	60	53	50	29.5	0.995	71	Train	0
2	162	53	54	22	36.3	2.225	72	Train	0
11	88	89	13	257	30.5	0.561	40	Train	1
10	110	87	52	144	40.6	1.028	73	Train	0
10	144	66	32	245	44.4	1.146	40	Train	1
10	157	75	51	18	41.4	1.863	63	Train	0
8	98	96	14	204	26.9	1.563	44	Train	1
5	118	57	54	149	31.8	2.054	33	Train	0
10	196	93	49	51	27.8	2.298	56	Train	0
0	91	50	51	99	28.7	0.483	29	Train	0
5	136	106	49	249	39	0.648	66	Train	0
9	132	64	26	96	32.7	2.309	58	Train	0
8	163	105	52	158	26.5	0.551	27	Train	0
10	156	105	13	242	42.4	1.765	51	Train	0
11	148	102	44	186	28.9	0.451	37	Train	1
6	189	103	23	72	39.8	0.082	46	Train	0
6	105	110	35	250	33.7	0.929	72	Train	0
0	184	50	48	140	44.9	2.3	69	Train	0
4	179	64	21	265	29.9	0.435	70	Train	0
7	149	110	15	210	31.6	1.443	64	Train	1
11	111	116	38	253	22.7	2.424	33	Train	0
3	139	89	32	61	32.1	1.291	53	Train	0
11	142	57	49	257	34.3	2.489	71	Train	0
0	109	66	19	273	36.4	0.721	56	Train	0
11	146	116	24	271	29.5	0.766	71	Train	1
1	112	111	57	96	25.6	1.616	53	Train	0
6	151	119	17	33	21.7	0.88	55	Train	1
10	140	100	11	188	43.6	0.827	59	Train	0
0	173	108	43	208	26.7	1.306	56	Train	0
6	152	64	16	127	18.6	2.141	40	Train	1
1	107	62	49	298	21.6	1.692	47	Train	1
6	177	61	29	239	21.8	1.437	66	Train	1
4	173	84	25	98	24.8	2.309	66	Train	1
2	148	56	59	35	30.3	1.836	29	Train	1
11	118	119	43	239	43.8	1.83	70	Train	1
5	140	94	57	58	31.4	1.857	73	Train	1
4	177	62	49	99	19.9	1.469	35	Train	0
6	198	96	44	26	24.5	1.288	46	Train	0
2	89	57	15	241	30.4	1.703	42	Train	0
9	147	79	30	233	39.5	0.931	52	Train	0
2	158	110	45	115	25.6	1.449	26	Train	0
7	143	96	48	103	28.9	1.449	28	Train	0
5	100	97	59	187	22.1	0.237	28	Train	1
0	115	95	27	173	25.3	0.197	59	Train	0
7	135	86	22	80	37.4	0.803	29	Train	0
11	195	89	21	232	21.5	1.374	50	Train	0
11	108	87	34	125	31.3	1.077	28	Train	0
10	125	56	41	72	40.9	0.054	50	Train	1
8	172	93	32	15	38.2	1.152	54	Train	0
8	136	108	55	125	40.2	1.289	39	Train	0
8	131	51	43	85	29.7	1.495	22	Train	1
0	84	79	34	274	44.6	1.545	64	Train	1
7	159	98	40	137	28.2	1.818	74	Train	0
2	155	105	33	57	41.3	2.01	68	Train	1
0	111	95	10	272	29.2	0.684	23	Train	0
7	180	58	33	83	42.5	2.011	63	Train	0
1	156	84	49	261	41.8	1.359	55	Train	0
10	132	79	55	76	25.2	1.931	67	Train	0
1	118	50	45	44	39.3	0.561	36	Train	0
10	163	69	55	81	44.4	0.616	39	Train	0
9	160	54	18	136	42	1.888	64	Train	1
11	191	51	51	92	26.2	0.184	66	Train	0
5	180	58	52	266	40.7	0.714	31	Train	1
1	154	76	24	153	25.7	1.732	71	Train	0
5	150	90	53	139	31.1	2.387	23	Train	0
9	106	82	50	137	19.9	2.376	21	Train	0
10	180	57	20	292	21.5	2.267	54	Train	0
6	137	88	39	31	41.1	0.176	24	Train	0
4	110	79	40	93	38	1.91	73	Train	1
9	179	53	47	150	29.5	0.22	68	Train	0
8	144	100	43	196	40	2.321	47	Train	1
7	118	66	55	210	30.1	1.341	44	Train	1
10	98	99	49	229	32	0.488	35	Train	1
5	175	92	20	228	18.8	1.392	28	Train	0
1	121	58	13	156	37.9	0.274	52	Train	0
10	194	81	23	255	39.5	1.796	69	Train	0
8	175	75	55	200	40.3	0.118	34	Train	0
0	137	84	19	60	25	2.242	24	Train	0
5	128	104	14	204	41.8	2.401	39	Train	1
3	122	55	54	55	31.4	2.267	29	Train	0
9	193	113	50	22	36.1	2.406	65	Train	0
0	194	74	33	129	37.7	1.711	50	Train	0
4	132	96	27	19	22.4	2.297	46	Train	0
8	102	70	10	243	18.6	0.637	24	Train	1
6	144	72	49	242	35.4	1.062	46	Train	0
11	150	50	27	161	24.8	1.063	44	Train	0
2	141	119	27	87	36.9	0.134	41	Train	0
4	140	72	42	267	42.8	0.079	21	Train	1
3	189	77	39	97	39.1	0.239	58	Train	0
10	176	75	24	120	28.7	0.766	28	Train	0
2	107	114	40	289	24.2	2.031	43	Train	1
0	80	95	48	101	31	0.752	30	Train	0
0	106	88	42	44	23.5	2.338	46	Train	0
4	130	107	33	26	18.5	0.145	53	Train	1
10	198	102	49	195	25.3	1.92	47	Train	1
10	100	102	10	221	44.6	0.488	52	Train	0
2	106	82	47	212	24	2.02	65	Train	0
11	145	119	12	212	39.3	0.569	55	Train	1
5	181	55	50	172	42.2	0.228	68	Train	0
0	157	83	52	220	21.2	0.32	30	Train	0
0	184	114	28	167	31.9	0.66	62	Train	0
11	98	103	10	153	26.7	1.444	53	Train	0
11	140	103	55	100	19.7	1.227	70	Train	0
3	162	103	28	136	36.2	1.206	23	Train	0
8	182	62	40	196	40.5	1.518	25	Train	0
5	139	83	17	244	34.9	2.139	74	Train	1
3	197	101	16	35	19.4	2.242	73	Train	0
1	193	105	42	28	18.9	1.319	33	Test	1	1
4	142	104	59	41	28.2	1.659	71	Test	1	1
7	194	62	10	149	24.7	2.276	21	Test	1	1
3	199	60	52	133	33.2	2.226	55	Test	1	1
2	118	79	50	226	39.9	1.961	22	Test	1	1
2	103	62	47	192	27.2	2.283	45	Test	1	1
10	148	113	49	80	29.5	0.788	21	Test	1	1
2	149	57	34	258	30.2	1.196	37	Test	1	1
6	141	113	50	143	26.5	1.637	25	Test	1	1
6	167	114	38	91	23.3	0.523	43	Test	1	1
10	146	94	18	163	33.7	0.954	58	Test	1	1
0	99	119	41	197	43.6	0.855	34	Test	1	1
10	199	84	14	30	19.5	0.981	44	Test	1	1
1	116	64	39	188	18.4	0.249	28	Test	1	1
5	97	109	45	249	37.8	0.472	37	Test	1	1
10	101	83	45	96	25.8	2.088	42	Test	1	1
6	157	74	58	119	28.5	2.165	50	Test	1	1
11	186	53	40	90	42.8	0.309	68	Test	1	1
5	195	91	57	77	31.2	0.735	55	Test	1	1
8	106	80	10	40	28.7	0.169	39	Test	1	1
8	193	72	25	121	28.6	0.746	61	Test	1	1
5	112	103	17	185	22.5	2.399	39	Test	1	1
5	88	86	19	175	28.5	0.836	67	Test	1	1
7	88	56	34	291	21.2	2.004	35	Test	1	1
5	100	88	31	22	31.7	1.472	66	Test	1	1
9	190	81	37	270	32.6	1.499	48	Test	1	1
1	148	112	21	115	32.6	0.991	47	Test	1	1
11	162	97	24	240	40.8	2.441	25	Test	1	1
3	134	112	27	193	34.8	0.823	36	Test	1	1
11	165	84	50	36	41.4	1.401	41	Test	1	1
9	183	92	22	280	22.6	2.412	32	Test	1	1
3	173	70	37	92	26.6	1.577	29	Test	1	1
3	199	100	54	154	23.4	1.979	23	Test	1	1
3	154	72	10	244	33.4	1.075	37	Test	1	1
6	169	52	10	50	40.7	1.884	45	Test	1	1
1	103	113	26	257	21.4	0.42	53	Test	1	1
3	174	50	36	56	35.6	2.111	52	Test	1	1
0	170	55	27	152	34	1.805	70	Test	1	1
5	93	102	36	158	44.8	2.473	65	Test	1	1
0	91	59	41	236	18	0.785	41	Test	1	1
5	122	61	47	91	42.6	0.727	63	Test	1	1
2	90	90	18	40	29.8	1.016	42	Test	1	1
7	168	111	29	101	44.2	1.375	48	Test	1	1
6	104	52	57	180	24.7	1.067	46	Test	1	1
4	127	72	27	106	45	0.304	28	Test	1	1
10	148	97	49	179	22	0.08	39	Test	1	1
0	123	79	53	188	39.6	2.257	69	Test	1	1
11	171	51	16	209	22	0.651	33	Test	1	1
2	93	51	36	18	40.1	1.92	57	Test	1	1
4	86	102	33	201	30.7	1.399	58	Test	1	1
8	82	114	40	87	41.2	1.34	51	Test	1	1
7	147	112	19	114	35.8	2.467	67	Test	1	1
6	173	98	36	260	31.2	1.4	23	Test	1	1
7	186	86	58	104	36.2	1.298	24	Test	1	1
7	84	99	54	175	22.2	0.5	27	Test	1	1
10	108	64	40	88	38.6	1.942	72	Test	1	1
11	115	71	26	145	19.7	1.832	22	Test	1	1
10	181	82	36	284	22.6	1.174	33	Test	1	1
1	162	50	54	184	39.7	0.783	66	Test	1	1
7	182	96	31	274	21.4	0.624	31	Test	1	1
11	157	74	58	173	34.9	0.103	56	Test	1	1
7	126	87	27	212	40	0.98	23	Test	1	1
3	158	66	48	126	44.7	1.671	59	Test	1	1
8	185	102	58	89	27.1	1.535	22	Test	1	1
3	86	118	16	179	31.6	0.128	32	Test	1	1
0	171	57	22	213	32.2	0.125	72	Test	1	1
6	160	110	53	287	33.7	1.62	52	Test	1	1
3	100	59	12	124	23	1.132	62	Test	1	1
0	103	84	32	236	40.7	1.732	59	Test	1	1
6	143	113	45	20	42.6	0.938	40	Test	1	1
5	179	116	54	140	26.8	0.725	41	Test	1	1
11	151	118	24	267	30.2	0.453	27	Test	1	1
9	86	63	44	44	22.6	0.339	65	Test	1	1
6	101	116	10	110	30.9	0.946	23	Test	1	1
4	144	50	49	212	37.5	0.535	58	Test	1	1
6	130	84	48	101	19.4	1.289	42	Test	1	1
6	170	66	28	247	33.6	1.649	52	Test	1	1
2	89	87	47	184	19	2.05	65	Test	1	1
2	185	67	27	224	26.4	1.895	33	Test	1	1
4	172	88	46	66	18.6	1.339	37	Test	1	1
10	147	64	58	73	24.1	1.863	52	Test	1	1
1	194	87	13	98	40.5	1.161	33	Test	1	1
2	165	112	46	158	39.3	0.936	37	Test	1	1
3	191	50	58	90	25.1	2.158	70	Test	1	1
9	113	83	13	108	27.2	1.839	39	Test	1	1
11	151	99	34	123	35.3	1.121	39	Test	1	1
3	88	81	26	249	34.8	2.329	29	Test	1	1
6	183	107	33	268	22.9	0.085	73	Test	1	1
7	131	108	32	71	19.3	1.253	67	Test	1	1
0	113	78	31	40	29.5	2.186	28	Test	1	1
3	183	103	58	222	28.4	1.236	54	Test	1	1
11	179	108	43	51	24.5	0.579	68	Test	1	1
11	141	81	40	275	37.9	1.222	57	Test	1	1
3	87	63	41	154	40.7	1.094	31	Test	1	1
6	139	88	14	293	33	1.303	21	Test	1	1
8	121	109	48	299	20.7	0.267	68	Test	1	1
10	107	96	17	199	19	0.649	34	Test	1	1
6	131	112	47	257	19.3	1.516	35	Test	1	1
11	120	111	15	134	21.8	1.445	67	Test	1	1
5	151	89	48	37	27.8	1.295	22	Test	1	1
1	180	52	22	145	38.2	0.083	56	Test	1	1
3	125	109	46	216	29.5	1.837	39	Test	1	1
2	174	75	42	144	43.1	0.946	22	Test	1	1
6	89	107	56	48	31	0.8	27	Test	1	1
3	191	82	50	223	31.4	0.142	69	Test	1	1
10	168	80	27	22	36.7	0.386	32	Test	1	1
6	126	102	39	78	34.7	0.85	43	Test	1	1
7	138	91	24	276	36.3	2.371	38	Test	1	1
2	101	107	45	244	32.7	1.954	51	Test	1	1
8	134	95	45	50	40.5	2.419	58	Test	1	1
0	80	75	41	61	19.5	1.47	56	Test	1	1
1	99	56	40	224	44.7	1.533	48	Test	1	1
11	99	52	58	294	35.9	1.506	64	Test	1	1
8	165	80	40	291	28.2	2.321	51	Test	1	1
6	107	92	42	147	23.7	0.459	38	Test	1	1
0	177	68	42	294	41.2	2.441	64	Test	1	1
0	184	106	30	40	37.3	1.263	28	Test	1	1
1	190	92	16	131	38.1	0.092	67	Test	1	1
2	186	54	53	161	36	1.961	56	Test	1	1
7	101	61	53	26	35	2.442	74	Test	1	1
7	174	74	20	134	33.7	2.049	27	Test	1	1
4	191	72	45	68	39.8	1.241	39	Test	1	1
4	98	56	46	149	24.4	2.434	65	Test	1	1
10	147	54	19	163	44.6	0.8	61	Test	1	1
0	115	78	48	20	20.2	0.248	38	Test	1	1
1	175	103	17	246	37.9	1.865	68	Test	1	1
0	109	80	17	297	23.5	1.903	61	Test	1	1
8	183	71	45	228	37.4	2.358	31	Test	1	1
5	102	77	13	71	31.3	1.678	29	Test	1	1
6	136	55	59	52	21	1.556	41	Test	1	1
2	199	85	28	71	18.8	1.221	24	Test	1	1
5	90	98	44	293	30.5	2.343	50	Test	1	1
4	122	101	29	214	18.2	0.882	74	Test	1	1
3	152	74	31	51	33.4	1.481	65	Test	1	1
0	111	90	33	46	34	1.201	46	Test	1	1
6	92	78	57	294	20.6	1.294	29	Test	1	1
2	162	90	10	299	39.2	1.062	69	Test	1	1
1	87	97	11	271	41.7	0.962	46	Test	1	1
11	167	73	31	182	39.6	1.917	49	Test	1	1
11	88	78	31	137	30.3	1.013	66	Test	1	1
9	141	87	49	61	35.4	0.541	31	Test	1	1
4	103	55	22	180	28.5	0.953	74	Test	1	1
4	190	73	12	105	43.1	0.209	44	Test	1	1
0	114	118	50	48	25.1	0.337	39	Test	1	1
9	174	70	48	40	25.3	0.257	53	Test	1	1
8	83	63	23	34	19.3	1.83	37	Test	1	1
7	135	106	53	252	29	0.467	70	Test	1	1
7	192	79	29	218	41	2.022	39	Test	1	1
6	186	78	12	116	25	0.468	51	Test	1	1
1	148	104	24	239	25.7	0.875	44	Test	1	1
10	192	78	31	94	22.7	1.619	48	Test	1	1
7	95	113	52	142	32.8	0.983	57	Test	1	1
2	104	110	32	54	25.9	0.917	36	Test	1	1
4	174	119	47	21	26.3	0.9	57	Test	1	1
5	142	98	23	115	34.1	2.296	56	Test	1	1
6	186	102	55	23	19.1	1.322	69	Test	1	1
7	106	107	25	271	20.4	1.715	35	Test	1	1
2	196	89	30	102	43.1	0.752	22	Test	1	1
0	178	111	56	116	31.6	2.083	34	Test	1	1
5	189	107	48	145	43.5	1.355	51	Test	1	1
2	127	55	53	140	20.8	2.254	74	Test	1	0
7	167	75	35	202	19.7	0.487	24	Test	1	0
9	184	87	37	294	19.7	0.054	41	Test	1	0
9	115	94	39	267	21.7	0.954	52	Test	1	0
7	196	110	58	160	20.3	0.359	41	Test	1	0
1	96	65	25	182	34.2	0.166	42	Test	1	0
1	167	91	19	70	43.9	1.602	61	Test	1	0
4	191	113	39	294	42.8	1.77	25	Test	1	0
6	170	57	59	287	25.8	0.738	25	Test	1	0
5	158	52	34	45	43.4	0.603	42	Test	1	0
11	167	96	10	191	35.4	1.324	47	Test	1	0
6	137	102	23	192	24.4	1.527	64	Test	1	0
4	104	116	57	52	32.6	2.331	68	Test	1	0
1	135	75	40	66	28.3	0.164	58	Test	1	0
1	129	87	49	164	40.2	0.974	25	Test	1	0
5	132	53	44	174	35.9	1.229	72	Test	1	0
1	104	75	13	108	38.3	1.618	54	Test	0	1
2	95	114	10	161	20.3	0.546	61	Test	0	1
6	147	50	26	59	30.9	2.084	65	Test	0	1
11	153	102	38	64	19.6	2.395	51	Test	0	1
2	126	96	10	38	24.4	1.469	52	Test	0	1
3	100	67	19	268	35.3	1.788	55	Test	0	1
3	146	104	36	84	25.3	0.193	41	Test	0	1
2	174	85	46	100	22	2.233	35	Test	0	1
3	92	110	48	83	34.7	0.888	48	Test	0	1
0	105	100	48	76	20.6	0.924	39	Test	0	1
10	80	96	27	58	34.1	0.987	33	Test	0	1
0	177	73	23	189	24.5	0.503	33	Test	0	1
1	178	115	52	124	22.5	2.484	45	Test	0	1
5	157	50	19	217	40.9	1.827	69	Test	0	1
0	91	82	48	27	20.4	0.312	68	Test	0	1
5	170	62	35	178	42.5	1.225	64	Test	0	1
8	104	75	27	288	36.4	1.009	56	Test	0	1
11	195	105	15	154	30.5	0.21	28	Test	0	1
8	134	119	57	275	41.9	0.833	40	Test	0	1
0	187	55	35	297	35.3	0.942	67	Test	0	1
0	185	64	15	287	36.8	2.024	40	Test	0	1
0	127	52	39	167	26.3	0.743	36	Test	0	1
9	157	114	36	222	22.4	0.615	51	Test	0	1
8	199	108	22	248	20.8	0.871	70	Test	0	1
5	120	74	30	227	42.3	1.154	74	Test	0	1
9	139	95	34	71	36.7	0.98	34	Test	0	1
11	175	64	41	290	28.1	0.075	51	Test	0	1
3	182	82	11	261	39	1.232	49	Test	0	1
4	159	88	20	176	38.9	0.472	23	Test	0	1
0	169	70	57	80	28.9	1.439	32	Test	0	1
9	185	74	41	135	44.6	1.145	49	Test	0	1
8	111	77	15	44	41.5	1.94	64	Test	0	1
6	190	87	41	226	32.9	1.447	50	Test	0	1
3	136	66	57	196	25.5	1.396	47	Test	0	1
10	194	104	58	84	22.6	1.733	36	Test	0	1
9	113	102	20	69	22.7	1.284	68	Test	0	1
9	118	55	50	119	35.5	1.848	55	Test	0	1
0	172	116	47	218	41.6	1.72	49	Test	0	0
8	187	100	35	213	21.3	1.206	30	Test	0	0
1	100	52	18	259	18.9	0.423	66	Test	0	0
6	94	82	33	236	36.1	1.349	73	Test	0	0
6	89	57	32	293	41.4	1.696	45	Test	0	0
1	186	86	59	240	43.5	1.324	29	Test	0	0
3	147	116	34	216	30.4	1.683	45	Test	0	0
7	161	61	13	72	21.7	0.341	67	Test	0	0
11	159	85	38	193	44.2	1.765	44	Test	0	0
3	83	92	34	163	42.6	1.369	21	Test	0	0
2	127	89	30	186	33.4	1.352	44	Test	0	0
3	150	102	11	132	25.4	1.517	37	Test	0	0
0	122	70	33	272	25.4	1.937	35	Test	0	0
10	85	57	19	134	20.7	1.833	46	Test	0	0
2	100	102	21	27	22.2	0.688	64	Test	0	0
8	137	119	31	182	21	0.749	27	Test	0	0
10	139	107	33	290	37.2	0.677	32	Test	0	0
2	134	112	40	129	37.1	1.94	57	Test	0	0
9	157	66	50	209	40	1.272	62	Test	0	0
0	104	78	10	103	21.6	1.265	42	Test	0	0
1	138	95	59	268	27.5	0.25	22	Test	0	0
3	190	118	24	196	33.1	0.103	41	Test	0	0
9	159	117	33	198	42.4	0.643	61	Test	0	0
4	116	111	17	17	30.3	0.188	55	Test	0	0
8	160	119	32	48	39.7	0.224	44	Test	0	0
8	138	88	28	68	19.5	0.782	42	Test	0	0
8	131	113	52	253	42.9	0.866	28	Test	0	0
2	143	62	10	205	39.7	1.014	35	Test	0	0
8	153	84	52	216	29.9	1.777	39	Test	0	0
6	163	74	44	84	34	0.889	24	Test	0	0
4	168	84	52	283	26.1	2.066	61	Test	0	0
9	162	72	12	191	21.6	1.711	30	Test	0	0
0	135	90	53	297	18.4	1.262	65	Test	0	0
10	196	88	46	67	38.3	0.863	46	Test	0	0
5	158	71	38	42	31.1	1.484	69	Test	0	0
11	150	65	16	107	32.5	0.287	44	Test	0	0
10	196	105	16	117	32.5	0.38	26	Test	0	0
5	107	118	12	260	37.7	1.992	66	Test	0	0
6	103	118	22	157	31.9	2.374	73	Test	0	0
1	133	61	36	60	18.9	2.076	50	Test	0	0
7	149	86	14	157	29.8	0.454	34	Test	0	0
6	148	107	10	257	25.5	1.206	71	Test	0	0
5	103	77	44	233	44.2	0.941	55	Test	0	0
11	126	51	22	251	28.1	1.443	32	Test	0	0
7	119	62	18	28	20.5	1.932	60	Test	0	0
1	146	51	33	38	24	1.871	48	Test	0	0
9	157	58	37	153	19.5	1.14	58	Test	0	0
7	186	113	25	254	40.9	0.102	34	Test	0	0
